# Supplementary material for: Patient burden of Sjögren’s: a comprehensive literature review revealing the range and heterogeneity of measures used in assessments of severity
Source: PubMed Central journal article supplement — RMD Open. 2017 Sep 17;3(2):e000443. doi: 10.1136/rmdopen-2017-000443 (PMC5604724; doi:10.1136/rmdopen-2017-000443), 2017-09-17
Supplement: rmdopen-2017-000443supp004.pdf [file rmdopen-2017-000443supp004.pdf]

**Supplementary Table 4.** Overview of clinical trials of biologic therapies using PROs as study endpoints

| Reference                  | Therapy<br>(assessment time<br>frame)<br>Patients (N)           | Hierarchy of PRO(s) in endpoints                                                                                                                                                                                                                                                                    | PRO(s)                                                                       | Statistically<br>significant<br>improvement vs<br>comparator |
|----------------------------|-----------------------------------------------------------------|-----------------------------------------------------------------------------------------------------------------------------------------------------------------------------------------------------------------------------------------------------------------------------------------------------|------------------------------------------------------------------------------|--------------------------------------------------------------|
| Norheim <i>et al.</i> (1)  | Anakinra vs. placebo<br>(4 weeks)<br>N = 26                     | Primary (group-wise comparison of fatigue VAS scores at Week 4 adjusted for baseline)                                                                                                                                                                                                               | Primary endpoint                                                             | NS                                                           |
|                            |                                                                 |                                                                                                                                                                                                                                                                                                     | Fatigue Severity Scale (FSS)                                                 | NS                                                           |
|                            |                                                                 |                                                                                                                                                                                                                                                                                                     | Fatigue VAS > 50% reduction                                                  | P = 0.03                                                     |
|                            |                                                                 |                                                                                                                                                                                                                                                                                                     | Beck Depression Inventory (BDI)                                              | NS                                                           |
| Sankar <i>et al.</i> (2)   | Etanercept vs. placebo<br>(12 weeks)<br>N = 28                  | Primary (improvement in 2 of the 3 Sjögren's disease domains: oral, ocular, and laboratory: ≥ 20% in dry mouth by VAS or ≥ 20% in total stimulated salivary flow, ≥ 20% improvement in either dry eyes VAS, van Bijsterveld score, or Schirmer I test; Laboratory: ≥ 20% in serum IgG level or ESR) | Primary endpoint                                                             | 36% etanercept group; 21% placebo group; NS                  |
|                            |                                                                 |                                                                                                                                                                                                                                                                                                     | Dry mouth VAS (0–100)                                                        | NS                                                           |
|                            |                                                                 |                                                                                                                                                                                                                                                                                                     | Dry eye VAS (0–100)                                                          | NS                                                           |
|                            |                                                                 |                                                                                                                                                                                                                                                                                                     |                                                                              |                                                              |
| Mariette <i>et al.</i> (3) | Infliximab vs. placebo<br>TRIPPS study<br>(22 weeks)<br>N = 103 | Primary (≥ 30% improvement in 2 of the 3 VAS at Week 10)                                                                                                                                                                                                                                            | Primary endpoint                                                             | 27.8% infliximab group; 26.5% placebo group; NS              |
|                            |                                                                 |                                                                                                                                                                                                                                                                                                     | Joint Pain VAS (0–100)                                                       | NS                                                           |
|                            |                                                                 |                                                                                                                                                                                                                                                                                                     | Fatigue VAS (0–100)                                                          | NS                                                           |
|                            |                                                                 |                                                                                                                                                                                                                                                                                                     | Most disturbing buccal, ocular, skin, vaginal, bronchial dryness VAS (0–100) | NS                                                           |
|                            |                                                                 |                                                                                                                                                                                                                                                                                                     | SF-36                                                                        | NS                                                           |
|                            |                                                                 |                                                                                                                                                                                                                                                                                                     |                                                                              |                                                              |

| Reference                   | Therapy<br>(assessment time<br>frame)<br>Patients (N)        | Hierarchy of PRO(s) in endpoints                        | PRO(s)                                                                                                                                 | Statistically<br>significant<br>improvement vs<br>comparator                                                                                                                                                                            |
|-----------------------------|--------------------------------------------------------------|---------------------------------------------------------|----------------------------------------------------------------------------------------------------------------------------------------|-----------------------------------------------------------------------------------------------------------------------------------------------------------------------------------------------------------------------------------------|
| Dass <i>et al.</i><br>(4)   | Rituximab vs.<br>placebo<br>(6 months)<br>N = 17 pilot study | Primary (20% improvement in<br>Fatigue VAS at 6 months) | Primary endpoint<br><br>Fatigue VAS (6 months)<br><br>FACIT-F<br>Pain VAS<br>PROFAD Somatic Fatigue Domain<br>SF-36 Social Functioning | 87.5% rituximab<br>group vs 55.6%<br>placebo group: NS<br>49.5% rituximab<br>group vs 20.5%<br>placebo group: NS<br>Not reported<br>Not reported<br>NS<br>12 rituximab group vs<br>-25 placebo group: <i>P</i><br>= 0.01                |
| Meijer <i>et al.</i><br>(5) | Rituximab vs.<br>placebo<br>(48 weeks)<br>N = 30             | Secondary                                               | MFI<br><br>SF-36 Vitality<br>Oral sicca VAS (0–100)<br>Ocular sicca VAS (0–100)                                                        | <i>P</i> = 0.023 for reduced<br>activity at Week 36;<br><i>P</i> = 0.039 for reduced<br>motivation at Week<br>12<br><i>P</i> = 0.013 at Week 36<br>Oral sicca and ocular<br>sicca <i>P</i> < 0.05 for<br>both at Week 48 and<br>week 36 |

| Reference                            | Therapy<br>(assessment time<br>frame)<br>Patients (N)   | Hierarchy of PRO(s) in endpoints                                                                                                             | PRO(s)                                                                                                                   | Statistically<br>significant<br>improvement vs<br>comparator                                                                                                        |
|--------------------------------------|---------------------------------------------------------|----------------------------------------------------------------------------------------------------------------------------------------------|--------------------------------------------------------------------------------------------------------------------------|---------------------------------------------------------------------------------------------------------------------------------------------------------------------|
| Carubbi <i>et al.</i> (6)            | Rituximab vs. cDMARDs (120 weeks)<br>N = 41             | Secondary                                                                                                                                    | Patient Global Disease Activity VAS<br>Pain VAS<br>Fatigue VAS<br>Dryness VAS                                            | $P < 0.01$ at week 120<br>NS at week 120<br>$P < 0.05$ at week 120<br>$P < 0.01$ at week 120                                                                        |
| Devauchelle-Pensec <i>et al.</i> (7) | Rituximab vs. placebo TEARS study (6 months)<br>N = 120 | Primary (30 mm or greater improvement on 2 out of the 4 VAS scales at week 24)<br>Individual VAS scales secondary outcomes at Weeks 6 and 16 | Primary endpoint<br><br>Global Disease VAS (0–100)<br>Pain VAS (0–100)<br>Fatigue VAS (0–100)<br><br>Dryness VAS (0–100) | 23% rituximab group, 22% placebo group:<br>NS<br>NS at Week 6 or 16<br>NS at Week 6 or 16<br>$P < 0.001$ at Week 6;<br>$P = 0.012$ at Week 16<br>NS at Week 6 or 16 |

cDMARDs = conventional disease modifying anti-rheumatic drugs; ESR = erythrocyte sedimentation rate; FACIT-F = Functional Assessment of Chronic Illness Therapy-Fatigue; IgG = immunoglobulin G; MFI = Multidimensional Fatigue Inventory; NS = not significant; PRO = patient-reported outcome; PROFAD-SSI = Profile of Fatigue and Discomfort; SF-36 = 36-Item Short Form Survey; TEARS = Tolerance and Efficacy of Rituximab in Sjogren’s Disease; TRIPPS = Trial of Remicade In Primary Sjögren’s Syndrome; VAS = Visual Analog Scale.

## SUPPLEMENTAL REFERENCES

1. Norheim KB, Harboe E, Gøransson LG, *et al.* Interleukin-1 inhibition and fatigue in primary Sjögren's syndrome – a double blind, randomised clinical trial. *PLoS One* 2012;**7**:e30123.
2. Sankar V, Brennan MT, Kok MR, *et al.* Etanercept in Sjögren's syndrome: a twelve-week randomized, double-blind, placebo-controlled pilot clinical trial. *Arthritis Rheum* 2004;**50**:2240–5.
3. Mariette X, Ravaud P, Steinfeld S, *et al.* Inefficacy of infliximab in primary Sjögren's syndrome: results of the randomized, controlled Trial of Remicade in Primary Sjögren's Syndrome (TRIPSS). *Arthritis Rheum* 2004;**50**:1270–6.
4. Dass S, Bowman SJ, Vital EM, *et al.* Reduction of fatigue in Sjögren syndrome with rituximab: results of a randomised, double-blind, placebo-controlled pilot study. *Ann Rheum Dis* 2008;**67**:1541–4.
5. Meijer JM, Meiners PM, Vissink A, *et al.* Effectiveness of rituximab treatment in primary Sjögren's syndrome: a randomized, double-blind, placebo-controlled trial. *Arthritis Rheum* 2010;**62**:960–8.
6. Carubbi F, Cipriani P, Marrelli A, *et al.* Efficacy and safety of rituximab treatment in early primary Sjögren's syndrome: a prospective, multi-center, follow-up study. *Arthritis Res Ther* 2013;**15**:R172.
7. Devauchelle-Pensec V, Mariette X, Jousse-Joulin S, *et al.* Treatment of primary Sjögren syndrome with rituximab: a randomized trial. *Ann Intern Med* 2014;**160**:233–42.
